# Supplementary material
Source: publisher site journal article supplement (https://www.dovepress.com/article/502355)
Supplement: Supplementary file 1 [file get_supplementary_file.php]

**Additional file 1: PRISMA-ScR Checklist**

| **Section** | **Item** | **Reported on Page Number** |
| --- | --- | --- |
| TITLE | | |
| Title | 1. Identify the report as a scoping review. | 1 |
| **ABSTRACT** | | |
| Structured summary | 2. Provide a structured summary including background, methods, results, and Discussion, conclusions. | 1-2 |
| **INTRODUCTION** | | |
| Rationale | 3. Describe the rationale for the review in the context of what is already known. | 3-4 |
| Objectives | 4. Provide an explicit statement of the questions being addressed regarding Population, Concept, and Context (PCC). | 4 |
| **METHODS** | | |
| Protocol and registration | 5. Indicate whether a review protocol exists, if and where it can be accessed (e.g., a web address), and, if available, provide registration information, including registration number. | 5 |
| Eligibility criteria | 6. Specify characteristics of the sources of evidence used as eligibility criteria (e.g., years considered, language, publication status), and provide a rationale. | 6-7 |
| Information sources | 7. Describe all information sources (e.g., databases with dates of coverage, contact with authors to identify additional sources), as well as the date the last search was executed. | 5-6 |
| Search | 8. Present the full electronic search strategy for at least one database, including any limits used, such that it could be repeated. | 5 |
| Selection of sources of evidence | 9. State the process for selecting sources of evidence (i.e., screening, eligibility) included in the scoping review. | 7 |
| Data charting process | 10. Describe the methods of charting data from the included sources of evidence (e.g., forms, independently, in duplicate) and any processes for obtaining and confirming data from investigators. | 8 |
| Data items | 11. List and define all variables for which data were sought and any assumptions and simplifications made. | 8 |
| Critical appraisal of individual sources of evidence | 12. If done, provide a rationale for performing a critical appraisal of included sources of evidence and describe the methods used. | 8 |
| Synthesis of results | 13. Describe the methods of handling and summarizing the data that were charted. | 8 |
| **RESULTS** | | |
| Selection of sources of evidence | 14. Give the numbers of sources of evidence screened, assessed for eligibility, and included in the review, with reasons for exclusions at each stage, ideally using a flow diagram. | 8 |
| Characteristics of sources of evidence | 15. For each source of evidence, present characteristics for which data were charted and provide the citations. | 8-9 |
| Critical appraisal within sources of evidence | 16. If done, present data on critical appraisal of included sources of evidence (see item 12). | 8 |
| Results of individual sources of evidence | 17. For each included source of evidence, present the relevant data that were charted that relate to the scoping review questions. | 11-25 |
| Synthesis of results | 18. Summarize and/or present the charting results as they relate to the review questions and objectives. | 12-18 |
| **DISCUSSION** | | |
| Summary of evidence | 19. Summarize the main results (including an overview of concepts, themes, and types of evidence available), including the strengths and limitations of the included evidence. |  |
| Limitations | 20. Discuss the limitations of the scoping review process. | 29 |
| Conclusions | 21. Provide a general interpretation of the results with implications for future research, practice, and/or policy. | 20 |
| **FUNDING** | | |
| Funding | 22. Describe sources of funding for the included sources of evidence, as well as for the scoping review itself. | 31 |

**Additional file 2: Search Strategies Used in this Scoping Review**

1. **Search Strategy for Medline (via PubMed):**

**Search string:** (Pharmacogenomics OR Pharmacogenetics) AND (childhood cancers OR pediatric cancers) AND (Africa OR East Africa OR West Africa OR South Africa OR Central Africa)

**Date of search:** September 14, 2024

**Filters:** English, Humans, from 1991 (This was auto set) to September 2024

**Total results generated**: 163 articles

**Results identified and considered for potential inclusion:** 15

1. **Search Strategy for Embase:**

**Search string:** (Pharmacogenomics OR Pharmacogenetics) AND (childhood cancers OR pediatric cancers) AND (Africa)

**Date of search:** September 25, 2024

**Filters:** English, Health, specific journal from catalog, articles with search term on the title, published about Africans and by African author from inception to September 2024

**Total results retrieved:** 8 articles

**Results identified and considered for potential inclusion:** 2

1. **Search Strategy for African Journals Online (AJOL):**

**Search string:** Pharmacogenomics AND childhood cancers AND Africa

**Date of search:** September 28, 2024

**Filters**: English, from inception to September 2024

**Total results generated:** 25 articles

**Results identified and considered for potential inclusion:** 3

1. **Search Strategy for Google Scholar:**

**Search string:** "Pharmacogenomics" OR "Pharmacogenetics" AND ("childhood cancer" OR "pediatric cancer") AND ("Africa" OR "East Africa" OR "West Africa" OR "South Africa" OR "Central Africa")

**Date of search:** September 23,24, and 25, 2024

**Filters:** Any time, English only, sort by relevance, any type

**Total results generated:** 582 articles (limited due to the scope of the platform we continued until 10 times)

**Results identified and considered for potential inclusion:** 20

1. **Search Strategy for African Index Medicus (AIM) through WHO Global Index Medicus:**

**Search string:** Pharmacogenomics

**Date of search:** September 30, 2024

**Filters:** English, from inception to September 2024

**Total results generated:** 20 articles

**Results identified and considered for potential inclusion:** 3

1. **Search Strategy for Cochrane Library**

**Search string:** (Pharmacogenomics OR Pharmacogenetics) AND Africa

**Date of search**: September 22, 2024

**Filters:** Trials and systematic reviews, English, from inception to September 2024

**Total results generated:** 3 articles

**Results identified and considered for potential inclusion:** 0

**Additional file 3: Critical Appraisal Checklist for Pharmacogenomics Research in Childhood Cancers Chemotherapies in Africa**

| Criteria | Yes | No | Comments |
| --- | --- | --- | --- |
| **1. Relevance to Review Objectives** | | | |
| - Does the study fulfill at least one of the review's three objectives? |  |  |  |
| - Does the study map existing literature on pharmacogenomics in childhood cancer chemotherapy use in Africa? |  |  |  |
| - Does the study describe the main findings in pharmacogenomics of childhood cancer therapy in Africa? |  |  |  |
| - Does the study explore gaps in the literature on pharmacogenomics in childhood cancer therapy in Africa? |  |  |  |
| **2. Study Methodology** | | | |
| - Is the study methodology clearly described? |  |  |  |
| - Is the study design appropriate for addressing the research questions? |  |  |  |
| - Are the methods used for data collection and analysis valid and reliable? |  |  |  |
| **3. Study Population** | | | |
| - Does the study clearly define the population (children with cancer) under investigation? |  |  |  |
| - Is the population relevant to the African context? |  |  |  |
| **4. Study Results** | | | |
| - Are the results clearly reported? |  |  |  |
| - Are the outcomes relevant to pharmacogenomics in childhood cancer therapy? |  |  |  |
| **5. Study Validity and Generalizability** | | | |
| - Are the results valid (free from bias and confounding factors)? |  |  |  |
| - Can the study's results be generalized to other populations or contexts within Africa? |  |  |  |
| **6. Implications for Practice and Policy** | | | |
| - Does the study provide clear implications for clinical practice or public health policy? |  |  |  |
| - Are the study's findings applicable to children with cancer in Africa? |  |  |  |
| **7. Ethical Considerations** | | | |
| Were ethical considerations mentioned (e.g., ethical approval, consent)? |  |  |  |
| - Were patient data handled according to ethical standards? |  |  |  |

**Additional file 4: LIST OF EXCLUDED STUDIES**

| SN | Authors | Title | Year | Country | Design |
| --- | --- | --- | --- | --- | --- |
| 1 | Uittenboogaard et al. | Pharmacogenomics of Vincristine-Induced Peripheral Neuropathy in Children with Cancer: A Systematic Review and Meta-Analysis | 2022 | Kenya | A Systematic Review and Meta-Analysis |
| 2 | [Twesigomwe](https://ascpt.onlinelibrary.wiley.com/authored-by/Twesigomwe/David) et al. | Characterization of CYP2B6 and CYP2A6 Pharmacogenetic Variation in Sub-Saharan African Populations | 2024 | South Africa | Laboratory based study |
| 3 | Warnich et al. | Pharmacogenomic Research in South Africa: Lessons Learned and Future Opportunities in the Rainbow Nation | 2011 | South Africa | Descriptive Review |
| 4 | Rajman et al. | African Genetic Diversity: Implications for Cytochrome P450-mediated Drug Metabolism and Drug Development | 2017 | Zimbabwe | Systematic review and meta-analysis |
| 5 | Owolabi et al. | Personalizing medicine in Africa: current state, progress and challenges | 2023 | Nigeria | Descriptive Review |
| 6 | Langmia et al. | CYP2B6 Functional Variability in Drug Metabolism and Exposure Across Populations-Implication for Drug Safety, Dosing, and Individualized Therapy | 2021 | Zimbabwe | Descriptive Review |
| 7 | Mpye et al. | Disease burden and the role of pharmacogenomics in African populations | 2017 | South Africa | Descriptive Review |
| 8 | Matimba et al. | Is there a role of pharmacogenomics in Africa | 2016 | South Africa | Descriptive Review |
| 9 | Kudzi et al. | Pharmacogenetics in Ghana: Reviewing the Evidence | 2011 | Ghana | Descriptive Review |

**Additional file 5: List of African countries included in the search strategy**

| Region | Country |
| --- | --- |
| Eastern Africa | Burundi, Comoros, Djibouti, Eritrea, Ethiopia, Kenya, Madagascar, Mauritius, Rwanda, Seychelles, Somalia, South Sudan, Tanzania, Uganda |
| Central Africa | Angola, Cameroon, Central African Republic, Chad, Congo, Democratic Republic of Congo, Equatorial Guinea, Gabon, Sao Tome and Principe |
| Northern Africa | Algeria, Egypt, Libya, Morocco, Sudan, Tunisia |
| Western Africa | Benin, Burkina Faso, Cape Verde, Côte d’Ivoire, Gambia, Ghana, Guinea, Guinea-Bissau, Liberia, Mali, Mauritania, Niger, Nigeria, Senegal, Sierra Leone, Togo |
| Southern Africa | Botswana, Eswatini, Lesotho, Malawi, Mozambique, Namibia, South Africa, Zambia, Zimbabwe |
